1 **DOMESTICATION AND TEMPERATURE MODULATE GENE**  
2 **EXPRESSION SIGNATURES AND GROWTH IN THE AUSTRALASIAN**  
3 **SNAPPER *CHRYSOPHRYS AURATUS***

4 Maren Wellenreuther<sup>1,2,\*</sup>, Jérémy Le Luyer<sup>3,4</sup>, Denham Cook<sup>1</sup>, Peter A. Ritchie<sup>5</sup>  
5 and Louis Bernatchez<sup>3</sup>

6

7 <sup>1</sup> The New Zealand Institute for Plant & Food Research Limited, Nelson, New Zealand

8 <sup>2</sup> Molecular Ecology and Evolution Group, Department of Biology, Lund University, Sweden

9 <sup>3</sup> Institut de Biologie Intégrative et des Systèmes (IBIS), Pavillon Charles-Eugène Marchand, Université  
10 Laval, Québec, Canada

11 <sup>4</sup> Ifremer, UMR 241 Ecosystèmes Insulaires Océaniques, Centre Ifremer du Pacifique, BP 49, 98725 Tahiti,  
12 Polynésie française (current address)

13 <sup>5</sup> School of Biological Sciences, Victoria University of Wellington, Wellington, New Zealand

14

15 \* Corresponding author: Maren Wellenreuther

16 T: +64 3 989 7658, F: +64 3 546 7049

17 E: [maren.wellenreuther@plantandfood.co.nz](mailto:maren.wellenreuther@plantandfood.co.nz)

18 Note: The first two authors contributed equally to this work

19

20

## ABSTRACT

21 Identifying genes and pathways involved in domestication is critical to understand how  
22 species change in response to human-induced selection pressures. We experimentally  
23 manipulated temperature conditions for F<sub>1</sub>-hatchery and wild Australasian snapper  
24 (*Chrysophrys auratus*) for 18 days and measured differences in growth, white muscle  
25 RNA transcription and haematological blood parameters. Over 2.2 Gb paired-end reads  
26 were assembled *de novo* for a total set of 33,017 transcripts (N50 = 2,804). We found  
27 pronounced growth and gene expression differences between wild and domesticated  
28 individuals related to global developmental and immune pathways. Temperature  
29 modulated growth responses were linked to major pathways affecting metabolism, cell  
30 regulation and signalling. This study is the first step towards gaining an understanding  
31 of the changes occurring in the early stages of domestication, and the mechanisms  
32 underlying thermal adaptation and associated growth in poikilothermic vertebrates. Our  
33 study further provides the first transcriptome resources for studying biological questions  
34 in this non-model fish species.

35

36 **Keywords: Domestication; Temperature; Transcriptomics, Growth, Sparidae.**

37

## INTRODUCTION

38 The domestication of plants and animals marks a major evolutionary transition and  
39 ascertaining the molecular and physiological basis of domestication and breeding  
40 represents a vibrant area of interdisciplinary research (Zeder 2015). Compared to  
41 terrestrial animals, the domestication of fish for human consumption started only  
42 recently (Yáñez *et al.* 2015) and with the exception of a few species, such as the  
43 common carp (*Cyprinus carpio*) or Nile tilapia (*Oreochromis niloticus*), most  
44 domestication effort date back to the early 1980s (Balon 2004). Consequently, most  
45 cultured fish species have only slightly changed from their wild conspecifics (Olesen  
46 *et al.* 2003; Li and Ponzoni 2015). This represents a unique opportunity to study how  
47 animals evolve during the transition from wild to captive conditions, as well as during  
48 the first generations of domestication.

49 For poikilothermic species such as fish, temperature plays a profound and  
50 controlling role in their biological functioning (Fry 1971; Hochachka and Somero  
51 2002). Affecting cellular components via a change in the viscosity of body fluids,  
52 fluidity of cell membranes, and enzyme kinetics (Currie and Schulte 2014)  
53 temperature influences the pathways by which individuals allocate energy to  
54 competing functions (Claireaux and Lefrançois 2007; Khan *et al.* 2015). For  
55 eurythermal fish (which can survive across a broad temperature range), such as the  
56 Australasian snapper (*Chrysophrys auratus*, Sparidae), environmental fluctuations  
57 dictate that their body temperatures vary in both space and time. When  
58 environmental temperatures are within a 'zone of tolerance' physiological,  
59 biochemical and behavioural aspects of the organisms biology are at, or near,

60 optimal (Pörtner 2010; Currie and Schulte 2014). Yet when temperatures are at the  
61 extremities of this tolerable range both acute and chronic stress responses can be  
62 observed and translate into reduced organismal performance, adversely affecting  
63 growth, routine activity, or reproduction (Fry 1971; Mininni *et al.* 2014; Schulte 2014).  
64 However, the thermal tolerances of fish commonly show significant plasticity, with  
65 notable intraspecific variability and acclimatory responses reported in both  
66 eurythermal and stenothermal (narrow thermal tolerance) species (Seebacher *et al.*  
67 2005; Anttila *et al.* 2013; Sandblom *et al.* 2014; Metzger and Schulte 2018). Given  
68 the profound influence of temperature on fish metabolism and organismal  
69 performance, a comparison of how temperature affects wild and domestic strains of  
70 snapper is an important question to address.

71         Rapid growth is a key determinant of commercial farming success, and is  
72 heavily modulated by the ambient temperature (Mininni *et al.* 2014; Bizuayehu *et al.*  
73 2015; Besson *et al.* 2016). Moreover, growth is frequently correlated with a number  
74 of life-history traits, such as gonad maturation and reproductive timing (Schaffer  
75 1979; Thorpe 1994; Devlin and Nagahama 2002). Consistent with the complex  
76 associations of growth with other traits is the finding that the genetic architecture of  
77 this trait is typically polygenic and determined by a complex network of genes (Filteau  
78 *et al.* 2013; Wellenreuther and Hansson 2016). This complexity makes it challenging  
79 to understand the specific genetic and physiological determinants that underpin  
80 faster growing phenotypes that need to be targeted when selectively breeding for  
81 enhanced growth.

82         For many commercially valuable species, selective breeding programmes  
83 have been initiated to produce strains that have an improved tolerance to domestic

84 conditions and develop more quickly into a marketable phenotype (Olesen *et al.*  
85 2003; Bernatchez *et al.* 2017). Understanding how domesticated organisms have  
86 been transformed from their ancestral wild type is valuable both from a genetic and  
87 evolutionary perspective, and provides fundamental information for future  
88 enhancement of strains through selective breeding. Genetic differences between wild  
89 and domesticated individuals can arise in three main ways. First, they can be  
90 inevitable by-product from a relaxation of natural selection pressures in captive  
91 conditions (Hutchings and Fraser 2008). By virtue of being raised in an artificial and  
92 controlled setting, farmed populations undergo inadvertent genetic changes because  
93 fish experience stable temperatures and no natural predators or significant foraging  
94 challenges. Second, intentional domestication selection (e.g. to enhance  
95 commercially relevant traits) and inadvertent or novel natural selection (e.g. the  
96 amount and quality of space provided) tend to favour fish that survive best in  
97 domesticated conditions, which can affect linked characteristics. Third, the often  
98 small population sizes of farmed species can cause strong genetic drift and  
99 inbreeding which can reduce the level of genetic diversity, increase the frequency of  
100 deleterious alleles, or overwhelm the strength of artificial selection and eliminate  
101 commercial important variation (Taberlet *et al.* 2011). This third process is commonly  
102 observed in the rapid loss of standing genetic variation in domesticated strains  
103 following a few generations of selective breeding (Hill *et al.* 2000).

104         Due to the recent domestication history of many fish species, they provide an  
105 ideal model for investigating the genetic changes associated with domestication and  
106 captive breeding because there are still natural populations that can be used as a  
107 reference (Mignon-Grasteau *et al.* 2005). Several studies to date have investigated

108 the effects of domestication on fish gene expression patterns (Roberge *et al.* 2005;  
109 Devlin *et al.* 2009; Sauvage *et al.* 2010), but these are almost entirely focussed on  
110 salmonid fishes. Moreover, much less work has been conducted to dissect the more  
111 specific changes responsible for accelerated growth in selectively bred strains.  
112 Indeed, while the factors and pathways underlying differential growth in mammals  
113 have been established in considerable detail, knowledge of the relevant genes  
114 involved in growth variation in fish is much more limited (Fuentes *et al.* 2013). This is  
115 due to the relative lack of fish-specific molecular tools and functional studies, and  
116 compounded by the extra level of complexity in fish genomes due to whole genome  
117 duplication and the subsequent rediploidization event(s) (Volf 2005).

118 Here we explore temperature induced growth and stress responses in wild and  
119 domesticated strains of the Australasian snapper *Chrysophrys auratus* to gain a  
120 better understanding of the domestication process and identify the genes and  
121 pathways important for growth in teleost fish. This marine species has a distribution  
122 from 25 to 40° S in temperate and sub-tropical waters in New Zealand and Australia  
123 and is highly valued by commercial and recreational fisheries (Parsons *et al.* 2014).  
124 Despite its commercial and recreational importance, no transcriptomic studies have  
125 been performed on this species so far. We performed a manipulative experiment and  
126 held wild and domesticated snapper in cold and warm treatments and measured their  
127 growth responses and white muscle RNA expression profiles. First, we compare  
128 phenotypic responses of wild and domesticated snapper to the temperature  
129 treatments to quantify any growth related changes. Second, we compare gene  
130 expression profiles to identify the genes that are affected by genotype (wild vs.  
131 domesticated) and temperature, and their interaction. Finally, we use co-expression

132 network models to gain insights into the metabolic modules and pathways affected in  
133 these genotype specific temperature responses, to better untangle growth and  
134 metabolic pathways in this species.

## 135 **MATERIALS AND METHODS**

### 136 **Fish holding and experimental setup**

137 The Institute of Plant and Food Research (PFR) in New Zealand has been breeding  
138 *C. auratus* since 2004 in Nelson, and in 2014, a selective breeding programme was  
139 started to select for enhanced growth in this species. Experiments were carried out  
140 on two-year-old wild-caught and hatchery reared domesticated *C. auratus*, from  
141 December 2015 to January 2016 at the PFR Seafood Facility in Nelson. Wild *C.*  
142 *auratus* were captured by trawl during a research voyage of the vessel FV Bacchante  
143 in the inner Tasman Bay (centred on S41 12.700 E173 09.400) in February 2015 and  
144 transferred to the PFR facility the same day (and thus had time to acclimatise in the  
145 hatchery for at least 10 months prior to the trial). The domesticated *C. auratus* strain  
146 was raised from naturally spawned larvae propagated from wild caught broodstock  
147 held at the PFR Nelson Seafood Research Facility. Prior to experimentation both  
148 populations were acclimatized in separate 5000 litre tanks provided with flow-through  
149 filtered seawater at ambient temperatures and light conditions. Both wild and  
150 domesticated *C. auratus* were fed on equivalent rations of mixed fish pieces,  
151 commercial aquaculture pellet (3 mm, Nova ME; Skretting, Cambridge, Tas.,  
152 Australia) and an in-house formulated gel diet consisting of 21.3% Protein, 2.7%  
153 Lipid, 5.6% Carbohydrate, 7.7% Ash, 62.7% moisture. All rearing, holding and

154 sampling procedures were performed using standard hatchery practices in  
155 accordance with New Zealand's Animal Welfare Act (1999).

156 Twenty fish from each of the wild and domesticated strain (also referred to as  
157 genotypes) were weighed, measured and imaged, under anaesthesia (20ppm AQUI-  
158 S®, AQUIS NZ Ltd, Lower Hutt, New Zealand) and moved into four 800 litre tanks (2  
159 x 10 wild-caught and 2 x hatchery reared *C. auratus*) supplied with 1µm filtered, UV  
160 sterilised, temperature-controlled flow through seawater (35ppt salinity, ambient  
161 temperature = 17.0°C). Once split, each tank consisted of either ten wild caught or  
162 domesticated *C. auratus* individuals.

163 Different thermal regimes were generated following a five day period of  
164 preconditioning at a nominal temperature of 17.0°C. One part of the wild caught and  
165 one domesticated strain were exposed to a temperature decrease of 1.0°C day<sup>-1</sup>  
166 while the remaining other wild and domesticated strain were exposed to a  
167 temperature increase of 1.0°C day<sup>-1</sup>. Following the five day period of  
168 increased/decreased temperatures the desired temperature differential of either 13.0  
169 or 21.0°C was established, henceforth referred to as low and high temperature  
170 treatments, respectively. These temperatures were chosen to reflect seasonal  
171 differences that these strains would experience in their local environment (i.e. winter  
172 and summer temperatures). Temperature loggers (HOBO, Onset Computer  
173 Corporation, MA, USA) showed that the thermal environment for the duration of the  
174 experiment maintained the desired treatment temperatures, with the low treatment  
175 having a mean temperature of 13.8°C and the high treatment having a mean  
176 temperature of 21.9°C, with minimal variation across the experiment (absolute  
177 maximum differences in the low and high treatment ±1.7°C and ±0.5°C, respectively).



178 Throughout the experiment, fish were maintained solely on the commercial  
179 pelletized (Skretting) diet described above at a ration equivalent to 2% body-mass  
180 per day, provided on a daily basis. Dissolved oxygen levels were checked multiple  
181 times per day to ensure levels were kept at >90% and tanks were cleaned every 3-4  
182 days. Once the desired temperatures were reached, the experiment was allowed to  
183 run for 18 days.

#### 184 **Animal sampling, RNA extraction and sequencing**

185 Upon termination of the experiment, eight fish from each treatment were  
186 anaesthetised (25ppm AQUI-S®) then netted from their tank and subsequently  
187 euthanized with an overdose of anaesthetic (60ppm AQUI-S®). Immediately  
188 following euthanasia, fish were imaged and weighed for identification and  
189 phenotyping. Then a 2-3ml sample of mixed whole blood was collected from the  
190 caudal vein and placed on ice using 21g hypodermic needles and EDTA treated  
191 vacutainers (BD, Franklin Lakes, NJ, USA). For the transcriptome assembly, 12 brain  
192 and 12 epaxial white muscle tissues muscle (removed from the D-muscle block  
193 immediately anterior of the dorsal fin), as well as three whole larvae (2-3 months of  
194 age) were preserved in RNAlater (Ambion, USA) at 4°C overnight before being  
195 transferred to -80°C for long-term storage.

196 Haematological parameters were assessed in all individuals to compare the  
197 physiological conditions between the two treatments. Haematocrit (Hct) was  
198 measured from whole blood immediately after collection using 75mm capillary tubes  
199 spun at 12,000rpm (4°C, 5min, Heidelberg, Germany). Haemoglobin concentration  
200 [Hb] was then measured spectrophotometrically by mixing 10µl of whole blood into

201 modified Drabkins reagent, measured in 1ml cuvettes (Wells *et al.* 2007). Mean  
202 Corpuscular haemoglobin concentration (MCHC) was estimated from the ratio of  
203 ([Hb]/Hct). Plasma was then separated by centrifugation (4,600rpm, 4°C, 10min) in  
204 200uL aliquots, snap frozen in liquid nitrogen and then stored at -80°C for later  
205 analysis of plasma metabolites. Plasma osmolarity was determined from freeze-  
206 thawed plasma samples using a Wescor vapour pressure osmomter (Vapro 5520,  
207 Wesco Inc. UT, USA). Plasma triglycerides were determined on a clinical blood  
208 analyser (Reflotron, Roche, Germany) using standard methods. Plasma lactate and  
209 glucose were measured using commercially available enzymatic assays kits  
210 (Megazyme K-Late and K-Gluc, Food Tech Solutions, New Zealand) performed and  
211 analysed in a 96-well microplate format (Clariostar, BMG Labtech, Germany).

212 Total RNA was extracted from 12 fish (six fish from each treatment) using the  
213 Trizol LS Reagent (Life Technologies) according to manufacturer's instructions. RNA  
214 samples were individually prepared (including mRNA enrichment with a ploy(A)  
215 method) for sequencing using the Illumina Tru-Seq kit on two lanes of an Illumina  
216 HiSeq 2000 sequencer (paired-end 100bp sequencing, 160bp insert length, see  
217 Supplementary Table 1) at the Beijing Genomics Institute Shenzhen, China.

## 218 **Sequence data processing and *de novo* transcriptome assembly**

219 All samples were used for the transcriptome assembly, but only the white muscle  
220 samples from the temperature experiment were used for the gene expression study.  
221 Sequences were first quality trimmed (trailing: 20; lowest quality: 30) and minimum  
222 length (< 60 bp) using Trimmomatic v0.36 software (Bolger *et al.* 2014). Trimming  
223 also included removal of putative contaminants from the UniVec database

224 (<https://www.ncbi.nlm.nih.gov/tools/vecscreen/univec/>). Trimmed sequences were  
225 further quality checked with FastQC v0.11.5 software  
226 (<https://www.bioinformatics.babraham.ac.uk/projects/fastqc/>). At this step, one  
227 individual was removed because of lower sequencing quality.

228 Paired-end reads were assembled into transcripts (min length 200 bp) using  
229 the Trinity v2.2.0 *de novo* assembly pipeline (Haas *et al.* 2013) with a default k-mer  
230 size of 25-bp. Raw transcripts (242,320) were filtered for presence of Open Reading  
231 Frames (ORFs) (length  $\geq$  300 nt), longest isoform matches and mapping rate ( $\geq$  1  
232 TPM), following (Pasquier *et al.* 2016) procedure. The remaining transcript  
233 sequences were searched against Uniprot-Swissprot database (blastX; e-value  $<$   
234  $10e-6$ ). For quality checks, the *de novo* transcriptome completeness was assessed  
235 with BUSCO v1.1b metazoa database (Simão *et al.* 2015). We used TransRate  
236 v1.0.3 quality statistics to validate each transcriptome filtering steps (Smith-Unna *et*  
237 *al.* 2016).

## 238 **Differential gene expression and genotype x environment interaction**

239 We first investigated genotype x environment interaction (GEI) from gene expression  
240 levels using a GLM approach (temperature x genotype) with the '*glmFit*' function and  
241 a likelihood-ratio test implemented in the R package edgeR (Robinson *et al.* 2010).  
242 We only considered genes with false discovery rate (FDR)  $<$  0.01 to be significant. To  
243 further quantify the additive effect of temperature and genotype, we conducted a  
244 GLM approach (temperature + genotype) on the dataset with prior removal of gene  
245 with significant interaction term. Genes were considered significantly expressed  
246 when FDR  $<$  0.01 and  $|\log_{2}FC| \geq 2$  (e.g. a fourfold difference between treatments).

## 247 **Co-expression network analysis**

248 Signed co-expression networks were built using the R package WGCNA following  
249 the protocol proposed by Langfelder and Horvath (Langfelder and Horvath 2008)  
250 based on normalized log-transformed expressions values. The main goal of this  
251 analysis was to cluster genes in modules associated with genotype and temperature  
252 effects and relevant gradients of clinical traits. Briefly, we fixed a soft threshold power  
253 of 22 using the scale-free topology criterion to reach a model fit ( $|R^2|$ ) of 0.81. The  
254 modules were defined using the 'cutreeDynamic' function (minimum 30 genes by  
255 module and default cutting-height = 0.99) based on the topological overlap matrix  
256 and a module Eigengene distance threshold of 0.25 was used to merge highly similar  
257 modules. For each module we defined the module membership (kME, correlation  
258 between module Eigengene value and gene expression values). Only modules with  
259 an absolute Pearson's correlation value ( $|R^2|$ ) > 0.75 with temperature and genotype  
260 factors and with p-value < 0.001 were conserved for downstream functional analysis.  
261 For module visualization we selected the top 30 genes (hereafter called hub genes)  
262 based on the kME values. The resulting gene networks were plotted with Cytoscape  
263 v3.5.1 (Shannon *et al.* 2003).

## 264 **Gene ontology and KEGG pathway visualization**

265 Gene enrichment analysis were conducted using GOAtools v0.6.5 (Klopfenstein *et al.*  
266 2018) based on the go-basic database (release 2017-04-14). Our background list  
267 included genes used for the gene network construction (after removing low-  
268 expressed genes, n = 13,282; see section above). Only GO terms with p-adj < 0.05  
269 and including at least three genes were considered (Supplementary Table 2). We

270 matched each DEG to corresponding KEGG pathway via the online web server  
271 KAAS (Moriya *et al.* 2007). The respective KEGG pathways were plotted using the  
272 Pathview R package (Luo and Brouwer 2013).

## 273 **RESULTS AND DISCUSSION**

### 274 **Phenotypic changes**

275 Upon termination of the experiments marked phenotypic differences were observed  
276 between genotypes and temperature treatments (Table 1, Figure 1). At the beginning  
277 of the trial we measured slight and non-significant differences in starting mass and  
278 length between the wild and domestic *C. auratus*, and at the end of the trial, these  
279 differences increased and were statistically significant, favouring the domestic  
280 genotype (Table 1). Temperature-related growth differences were also visible with  
281 either genotype achieving a significantly larger growth (length and mass) gains in the  
282 high temperate treatment (Table 1). Moreover, low temperature had a profound effect  
283 on growth rate, with a net effect of near-zero growth in the domestic strain and  
284 negative growth (a reduction in mass) in the wild. This may indicate that the  
285 domesticated strain is more resistant to cold stress than the wild strain, but also is  
286 more responsive to increases in temperature, each of which benefits maintenance  
287 and growth respectively.

### 288 **Transcriptome assembly quality and completeness**

289 We used a total of 2.2 Gb paired-end reads to assemble a raw transcriptome  
290 containing 242,320 transcripts (215 million bases). The final reference assembly

291 (after filtering) based on the different tissues types and replicate individuals  
292 represents a set of 33,017 transcripts (N50 = 2,804; GC content = 48.6%; Table 3).  
293 The final transcriptome completeness evaluation with BUSCO v1.1b (Simão *et al.*  
294 2015) indicated that 96% of the highly-conserved single-copy metazoan genes  
295 (n=978) were present in the transcriptome sequence (including 89.5% complete and  
296 present a single-copy). Transcriptome annotation resulted in 26,589 transcripts  
297 matching 17,667 Uniprot-Swissprot entries (e-value < 10<sup>-6</sup>; Table 3) for a total of  
298 11,985 transcripts associated with at least one of the Gene Ontology terms. For  
299 downstream expression analysis, only genes actually expressed in muscle (log CPM  
300 < 1 in at least two individuals) from the final assembly were retained, resulting in a  
301 total of 13,282 transcripts.

### 302 **Gene expression effects associated with domestication**

303 We found that 206 genes were differentially regulated between wild and first-  
304 generation domesticated *C. auratus* (FDR < 0.01; |logFC| > 2), with 150 genes being  
305 up- and 56 down-regulated in wild individuals (Table 4). The overall percentage of  
306 domestication affected genes is thus 1.5 % following one generation in the hatchery,  
307 which may include the effects of human artificial selection, founder effects, genetic  
308 drift and inadvertent selection due to the new rearing environment or to the selection  
309 of traits correlated to the traits of interest. In addition to that, it should also be noted  
310 that the differences in the environment of domesticated and wild fish during the larval  
311 and juvenile phase, could have effected the long-term gene expression, and that  
312 some of these have persisted even though fish were acclimatised to hatchery  
313 conditions for over 10 months before the trial started. The gene ontology analysis

314 revealed that the most enriched GO terms were involved in a strong global defense  
315 response (GO:0006952) and immune response (GO:0006955) (Supplementary Table  
316 2), both of which were more highly expressed in the wild strain. Interestingly, among  
317 the most strongly differentially expressed genes, we found that two serum amyloid  
318 proteins (A-1 and A-3) were heavily downregulated in the F<sub>1</sub>-domestic *C. auratus*  
319 fish. Proteins or mRNAs of the serum amyloid A family are highly conserved have  
320 been identified in all vertebrates investigated to date and function as major acute  
321 phase proteins in the inflammatory response (Uhlir and Whitehead 1999). The co-  
322 expression network analysis identified a single module with highly significant  
323 genotype correlation ( $|R^2| > 0.75$ ; p-value < 0.001), namely the darkorange2 module  
324 ( $R^2 = 0.88$ ). This module contained 94 genes and showed no significant enrichment,  
325 but tendencies for increased glutathione metabolic processes (GO:0004364) and  
326 transferase activity, transferring alkyl or aryl (other than methyl) groups  
327 (GO:0016765). Furthermore, the most negatively correlated module with genotype  
328 was the antiquewhite2 module (n = 1,227;  $R^2 = -0.69$ ), which showed enrichment for  
329 adaptive and innate immune response functions (GO:0002250 and GO:0045087,  
330 respectively), defense responses (GO:0006952) and a positive regulation of the  
331 Mitogen-Activated Protein Kinase (MAPK) cascade (GO:0043410) and ELK3 coding  
332 gene (antiquewhite2 module).

333 In fish, the domestication process has been shown to influence metabolism,  
334 behaviour and chronic stress and immune response (Álvarez and Nicieza 2003;  
335 Millot *et al.* 2009; Douxfils *et al.* 2011a, 2015). In the first fish study on this topic,  
336 Roberge *et al.* (2006) showed that juvenile Atlantic salmon (*Salmon salar*) had gene  
337 expression differences for at least 1.4 and 1.7% of the expressed genes following 5-7

338 generations of domestication. Of the differentially expressed genes they found a  
339 general reduction in basal metabolic rate and an increased metabolic efficiency in  
340 farmed juvenile salmon compared to its wild counterpart, favouring allocation of  
341 resources towards growth and fat deposition. This finding is consistent with the faster  
342 growth and higher fat yield in domesticated salmon from the same source (Rye and  
343 Gjerde 1996). Interestingly, they also detected two genes coding for MHC antigens  
344 were more highly transcribed in some farmed salmon presumably in response to  
345 selection for disease resistance. In the perch (*Perca fluviatilis*) domestication  
346 increased the immune response during a challenge experiment with *Aeromonas*  
347 *hydrophila* with a congruent difference in the levels of HSP70 circulating between the  
348 first and fourth generation in captivity (Douxflis *et al.* 2011a, 2011b). With respect to  
349 somatic growth, domestication responses in Coho salmon (*Oncorhynchus kisutch*)  
350 closely resemble responses following growth hormone insertion seen in other fish  
351 species, most likely due to the strong selection for enhanced growth rate (Devlin *et*  
352 *al.* 2009). Indeed, recent studies on GH transgenic salmon showed that the growth  
353 advantage resulting from the GH insertion was tightly linked and dependent on the  
354 immune system response capacity, suggesting that the GH/IGF pathway interacts  
355 with the global immune response pathways (Alzaid *et al.* 2017).

356 Results from the current study were similar to the observations reported in  
357 previous studies, whereby differences in growth between domesticated and wild *C.*  
358 *auratus* occur through an interaction of the immune response and anabolic growth  
359 pathway modulation. Highlighted by the enrichment of immunity related processes  
360 and the increased expression of the MAPK/ERK cascade – a key regulator of IGF-I &  
361 II mediated myogenesis and somatic growth regulation in both mammals and teleosts



362 (Codina *et al.* 2008; Fuentes *et al.* 2011) – these interactions suggest that in the wild  
363 *C. auratus* immune related activity was being prioritised above growth-related  
364 functions. This appeared to have negative consequences for the mass gain of the  
365 individuals over the experimental period. It is also noteworthy that modules  
366 segregating between genotypes are also tightly correlated to haematological  
367 indicators (Hb and MCHC outcomes, Table 1). When combined with the observation  
368 of green liver syndrome in the domestic low temperature treatment (results not  
369 presented), this outcome was considered to arise from a nutritional taurine deficiency  
370 in the experimental diets (Takagi *et al.* 2006; Matsunari *et al.* 2008), apparently  
371 exasperated by cold temperature exposure. It is interesting that this nutritional  
372 inadequacy interacts positively with the module enriched for immune response, and  
373 was not detected in wild individuals with the same recent nutritional history. This  
374 observation highlights the challenges of sourcing of nutritionally adequate feed for  
375 non-model as well as pre-commercial cultured fish species, as well as the unknowns  
376 implicitly associated with investigations involving wild caught fish. Additional studies  
377 will help to elucidate whether the patterns we observed result from different life  
378 history traits between genotypes (e.g. exercise, contact with pathogens, acclimation  
379 to captivity, different environmental and nutritional conditions in early life) and/or are  
380 the result of relaxed or novel selection in the early domestication processes.

### 381 **Temperature had a major effect on gene expression**

382 To quantify the extent of gene expression variation associated with temperature and  
383 identify differentially expressed genes, we used a combined multivariate analysis  
384 (Redundant Discriminant Analysis; RDA) and GLM approach with an additive effect

385 design (e.g. by removing the gene in the interaction, see Methods for details).  
386 Overall, temperature had the most profound effect on variation in expression  
387 explaining 47.2% of the total variance (Figure 2). This corroborates the differential  
388 expression analysis whereby (despite stringent filters  $FDR < 0.01$ ;  $|\log FC| > 2$ ) we  
389 found a large number of genes ( $n = 1,461$ ) differentially regulated between  
390 temperatures with 736 up- and 725 down-regulated genes in the high temperature  
391 relative to low temperature condition (Table 4; Figure 3). The gene ontology analysis  
392 on the total DE genes revealed that most enriched GO terms included tRNA  
393 aminoacylation for protein translation (GO:0006418) and sister chromatid  
394 segregation (GO:0000819), suggesting important differences in protein synthesis and  
395 cellular multiplication, both of which are key processes in myogenesis and somatic  
396 growth in fish.

397 We further dissected the global response to temperature using a co-  
398 expression network analysis, which has been shown to be particularly relevant for the  
399 functional analysis of non-model species (e.g. Filteau et al. 2013). We identified a  
400 total of 37 modules associated with a temperature response, but chose to only  
401 focused on 13 modules of these, based on whether they were significantly correlated  
402 ( $p < 0.01$ ) with either temperature and/or genotype (Figure 3). A total of four modules  
403 showed a highly significant correlation ( $|R^2| > 0.75$ ;  $p$ -value  $< 0.001$ ) with temperature,  
404 with three being positively [blue (0.84), darkviolet (0.95), mediumorchid (0.84)] and  
405 one being negatively correlated with temperature [bisque4 (-0.95)]. Four other  
406 modules, the magenta4, brown4, darkseagreen3 and lavenderblush2, showed a  
407 significant ( $p < 0.05$ ) yet lower correlation with temperature, ( $R^2 = -0.67, 0.65, 0.66$   
408 and  $-0.66$ , respectively). We validated the level of association by computing the

409 mean gene significance value for each module and found that most correlated  
410 modules show the highest absolute mean gene significance to temperature (Figure 3;  
411 Supplementary Table 2). We also found that 81.4% of the DEGs between  
412 temperature treatments were for the four most strongly correlated modules in the  
413 WGCNA analysis, which was a finding consistent with our network construction.  
414 Finally, a gene ontology enrichment analysis was conducted for each module (gene  
415 ontology enrichment results are compiled in Supplementary Table 2).

416 We went on to investigate the role of genes in the co-expression network in  
417 the global transcriptomic response by identifying several major genes associated with  
418 rapid growth, thermal compensation and/or a post-acclimation response. The  
419 network co-expression analysis revealed that the four modules that were most  
420 responsive to temperature (blue, darkviolet, mediumorchid and bisque4) were also  
421 strongly correlated to SGR and LGR growth traits (Table 1), suggesting that these  
422 modules are either directly involved or linked to growth modulation, independently of  
423 the genotype. For the blue module (n = 1,404 genes) we again found significant  
424 enrichment ( $p\text{-adj} < 0.05$ ) for amino acid activation (GO:0043038) and (GO:0043039)  
425 in accordance with our results for the DGE, but also for the generation of precursor  
426 metabolites and energy (GO:0006091), oxidoreduction coenzyme metabolism  
427 (GO:006733) and electron chain transport (GO:0022900). For the darkviolet module  
428 (n= 169 genes), we found significant enrichment for the haemoglobin complex  
429 (GO:0005833) and oxygen transport activity (GO:0005344). For the mediumorchid  
430 module (n = 1,370 genes), we found significant enrichment for global cell adhesion  
431 and metabolism, including extracellular structure organization (GO:0043062),  
432 collagen metabolic process (GO:0032963) and multicellular organism metabolic

433 process (GO:0044236). Finally, the bisque4 module (n = 2,063 genes) showed  
434 enrichment for functions involved in peroxisome structure and activity including  
435 protein import into peroxisome matrix, docking (GO:0016560) and peroxisomal  
436 membrane (GO:0005778). We also found that the module brown4 (n = 93 genes)  
437 had enrichment for protein folding (GO:0006457), negative regulation of transcription  
438 from RNA polymerase II promoter in response to stress (GO:0097201), as well as  
439 tendency for a response to heat function (GO:0009408; p-value < 0.001; p-adj = 1).  
440 Gene ontology enrichment results are compiled in Supplementary Table 2.

441 We also identified hub genes, which are reported as core regulating genes,  
442 within the most relevant four modules correlated to temperature based on their  
443 modular membership (kME) values (Figure 3). The hub genes selection identified key  
444 actors in the global temperature response within each module, often known as key  
445 regulators on biological pathways. Among the blue module, we identified several t-  
446 RNA ligases but also the YTH domain-containing family protein 2 and the eukaryotic  
447 translation elongation factor 1 epsilon-1, that play a role in RNA protection following  
448 heat stress and DNA protection after damage, respectively (Lewis *et al.* 2017; Chen  
449 *et al.* 2018). Among the mediumorchid module we found cyclic AMP-dependent  
450 transcription factors (namely ATF-4 and 5) that are transcription factors associated  
451 with the circadian rhythm regulation (Figure 4) as well as the Cryptochrome-1 coding  
452 gene, a core repressor of the circadian rhythm (Hardie *et al.* 2012).

453 Given this extensive temperature-induced transcription level biological  
454 reorganisation, we focus the following interpretation on the most relevant results that  
455 corroborate previous transcriptional and physiological studies relating to the thermal  
456 responses of fish. HSPs-coding genes (HSPs90 and HSPs70 and HSP-binding70)

457 were among the highest levels for differentially expressed genes we detected.  
458 Mostly clustered within the brown4 module ( $R^2 = 0.65$  with temperature), a significant  
459 increase in HSP expression was observed in *C. auratus* at temperatures at opposite  
460 ends of the species thermal envelope – at least in the geographic location the fish  
461 were cultured or captured in. This HSP response is well known in fish as a stress-  
462 induced response, which functions to protect against oxidative stress and apoptosis  
463 (Lindquist and Craig 1988; Iwama *et al.* 2004; Oksala *et al.* 2014). The HSP  
464 expression is often upregulated during short term (acute) exposures to high  
465 temperatures as seen in the gill and muscle tissues of the wild goby *Gillichthys*  
466 *mirabilis* exposed to 32°C over <8 hours (Buckley *et al.* 2006; Logan and Somero  
467 2010). In addition, HSP upregulation can also be commonly observed during  
468 seasonally and environmentally relevant thermal regime shifts within the zone of sub-  
469 lethal thermal tolerance for a species (Fader *et al.* 1994; Oksala *et al.* 2014). The  
470 HSP response observed, clustered within the brown4 module, showed no significant  
471 correlation with growth (both SGR and LGR), nor were there detectable differences  
472 between wild and domestic strains. This is notable as differences in HSP expression  
473 commonly underlie phenotypic differences within a species, and this has often been  
474 observed across geographical gradients (Fangue *et al.* 2006; Hirayama *et al.* 2006).

475 Temperature produced a pronounced phenotypic effect characterised by a  
476 positive change to the growth rate at warm temperatures (~21°C), and negligible  
477 growth changes at low (~13°C) temperatures. These phenotypic effects were  
478 underlined by substantial biological reorganisation associated with metabolic fuel  
479 switching and a shift from anabolic metabolism at high temperatures to  
480 maintenance/catabolism at low temperatures (Figure S3). Notable upregulation of

481 AMPK (mediumpurple4 module) was evident in at low temperatures. Commonly  
482 referred to as the cellular 'master switch', this signalling is known to produce a  
483 cascade of changes to cellular homeostasis to reduce energetically expensive  
484 metabolic pathways (Hardie 2007). The increased expression of driver genes within  
485 the PI3K-AKT-mTOR pathway (darkviolet module) clearly underscore the up-  
486 regulation of cellular signalling pathways and growth-related processes (i.e. protein,  
487 lipid, and glycogen synthesis; cellular proliferation) at high temperature, all of which  
488 are known responses in fish (Fuentes *et al.* 2011, 2013). The upregulated PI3K-AKT  
489 activity together with the expression of FOXO1 (expressed within bisque4 module)  
490 corroborates the reported atrophic/catabolic processes that we observed during the  
491 low temperature conditions. Notably, these growth responses were also associated  
492 with increased expression of the Atrogin-1 muscle growth inhibitor and the  
493 downregulation of the muscle growth promoters IGFBP1&7 (also contained in  
494 bisque4 module) (Glass 2005; Fuentes *et al.* 2013). The observed switch from  
495 catabolic to anabolic states strongly suggests a switching of how the metabolic  
496 energy was being used in *C. auratus* at the two different temperatures. The most  
497 down-regulated gene at high temperature was the Long-chain fatty (LFA) acid  
498 transport protein 1, a gene involved in regulating LFA substrates in tissues  
499 undergoing high levels of beta-oxidation or triglycerides synthesis. The modulation of  
500 these transport processes corresponds with significant differences in circulating  
501 triglyceride levels (Table 1). Also associated with this process is the apparent  
502 'glucose sparing' response and concomitant switch from carbohydrate to lipid based  
503 metabolism, inferred by the upregulation of both of beta-oxidation by ACC2 and  
504 gluconeogenic pathways via the PEPCK and phosphofructokinase / fructose

505 bisphosphate mediated metabolic pathways (Figure S4). Similarly, down-regulation  
506 of N-terminal glutamine aminohydrolase - a hub gene of the mediumorcid pathway  
507 that favours the production of glutamate - was observed in the high temperature  
508 treatment. It is only that glutamate has recently been shown to present a major non-  
509 carbohydrate based energy substrate for skeletal muscle in fish (Weber *et al.* 2016;  
510 Jia *et al.* 2017).

511         The extensive reorganisation of *C. auratus* metabolism across their natural  
512 temperature range presents an interesting area of future research, particularly with  
513 consideration of the vast seasonally-dependent growth differences evident.  
514 Moreover, the molecular mechanisms underlying the notable thermal plasticity  
515 present in many fishes are still poorly understood. Differential expression of genes  
516 has been investigated as a cause for phenotypic plasticity in three-spine stickleback  
517 (*Gasterosteus aculeatus*) (Metzger and Schulte 2018). Being affected by both  
518 developmental temperature, as well as by adult acclimation temperature, there are  
519 probable mechanistic links between gene transcription, epigenetic signatures and,  
520 thermal plasticity across different time scales (Metzger and Schulte 2018). The  
521 plasticity in fish response to temperature may promote phenotypic alterations and  
522 ultimately, population divergence (Schulte 2014) during successive generations in  
523 both aquaculture and ecological contexts (Anttila *et al.* 2013; Donelson *et al.* 2018).

#### 524 **Parallel and non-parallel reaction norms**

525 A total of 35 genes showed parallel reaction norms whereby both wild and  
526 domesticated fish showed the same gene expression responses to temperature (i.e.  
527 significant effects of temperature and genotype; Figure 2). We further tested the



528 hypothesis that temperature may impact gene expression but differently according to  
529 the genotype (interaction between temperature and genotype effects in a non-  
530 additive fashion; i.e. non-parallel reaction norms). To detect Genotype by  
531 Environment Interactions (GEI effects), we used a glm approach and a likelihood  
532 ratio test implemented in edgeR using the normalized data (Robinson *et al.* 2010).  
533 Only one gene, the Aryl hydrocarbon receptor nuclear translocator-like protein 2  
534 (Balm2), showed a significant GEI (FDR < 0.01; Figure 5). The transcriptional  
535 activator Balm2 is a core component of the circadian clock regulation in mammals  
536 (Ikeda *et al.* 2000). Temperature-dependent activation and compensation of circadian  
537 rhythm have been observed in both vertebrates and invertebrates (Menaker and  
538 Wisner 1983; Sawyer *et al.* 1997; Rensing and Ruoff 2002; Zhdanova and Reeb  
539 2006). Furthermore, different modulation of the circadian rhythm suggested  
540 adaptation to environmental cues after selective breeding for growth related traits  
541 during the early domestication process (López-Maury *et al.* 2008). Similarly, a switch  
542 in behaviour (day or nocturnal activity) has been observed during both temperature  
543 experiments and domestication selection in European sea bass (*Dicentrarchus*  
544 *labrax*) (Millot *et al.* 2009, 2010). The contrasting responses to temperature  
545 depending on the genotype background for some of the core regulators suggest that  
546 selection for a specific trait in aquaculture is also dependent of the rearing  
547 environment. More studies will be required to tease apart the responses to selection  
548 from any domestic environment-induced or plasticity effects that could occur during  
549 the larval rearing phase. Nevertheless, plasticity has significant impacts on the  
550 genetic gain calculation in many livestock breeding programs (Mulder 2016; Nguyen



551 *et al.* 2017), and will be an important parameter to assess for newly domesticated  
552 species, including fish.

553

## CONCLUSIONS

554 Although fish domestication has received considerable interest for many years from a  
555 range of disciplines, modern large-scale genomic technologies and newly formed  
556 captive populations provide a unique opportunity to shed light on an important and  
557 well-documented evolutionary change for aquatic species. In this study, we combined  
558 GLM based approaches to investigate synergistic effects of recent domestication and  
559 temperature effects on gene expression regulation in the Australasian *C. auratus*.  
560 Coupling differential expression clustering and gene co-expression networks allowed  
561 us to begin to untangle the complex mechanisms of growth modulation during the  
562 first steps of selection and acclimation to domestication conditions. Our study shows  
563 that recent domestication and temperature had combined effects on muscle gene  
564 expression levels. We observed that temperature affected primarily HSPs responses  
565 as well as tissue development and cell turnover while genotype mainly affected the  
566 global immune response. Only a single gene (*Baml2*), crucial for circadian rhythm  
567 control, was affected by GEI. Admittedly, the present study only assayed a single  
568 tissue and further investigation at the brain or hormone producing tissue would  
569 produce a better understanding of the role of behavioural changes and immune  
570 responses that occur during the first few generations of domestication selection. Our  
571 study adds to the small number of previous studies that showed that gene expression  
572 responses can change rapidly following a few generations of domestication.

573

## COMPETING INTERESTS

574 The authors declare that they have no competing interest.

575

## DATA ACCESSIBILITY

576 The raw data were deposited on NCBI (*C. auratus* BioProject PRJNA484029) and  
577 will be accessible upon acceptance of the manuscript. For reproducibility, the codes  
578 are deposited in GitHub ([https://github.com/jleluyer/PFR\\_snapper](https://github.com/jleluyer/PFR_snapper)).

579

## AUTHORS' CONTRIBUTIONS

580 MW and DC designed the experiments, MW and DC did the labwork, LB and JLL  
581 conducted the sequencing analysis. MW, JLL and DC wrote the manuscript. MW and  
582 PR developed the project proposals and funding. All authors read and approved the  
583 final manuscript.

584

## ACKNOWLEDGEMENTS

585 We would like to thank the staff at the Maitai Seafood Research Facility in Nelson,  
586 New Zealand, for help to run the experiment. This work was supported by a grant  
587 from the Ministry of Business, Innovation and Employment (MBIE) contract ID  
588 C11X1603 to MW and a VUW University Research Fund to PR. We would also like  
589 to thank Eric Normandeau for his help with genomic data analyses.

590

591

## REFERENCESVERSION

592 Álvarez, D., and A. G. Nicieza, 2003 Predator avoidance behaviour in wild and  
593 hatchery-reared brown trout: the role of experience and domestication. *J. Fish Biol.*  
594 63: 1565–1577.

595 Alzaid, A., J.-H. Kim, R. Devlin, S. Martin, and D. Macqueen, 2017 Growth hormone  
596 transgenesis disrupts immune function in muscle of coho salmon (*Oncorhynchus*  
597 *kisutch*) impacting cross-talk with growth systems. bioRxiv 210104.

598 Anttila, K., R. S. Dhillon, E. G. Boulding, A. P. Farrell, B. D. Glebe *et al.*, 2013  
599 Variation in temperature tolerance among families of Atlantic salmon (*Salmo salar*) is  
600 associated with hypoxia tolerance, ventricle size and myoglobin level. *J. Exp. Biol.*  
601 216: 1183–1190.

602 Balon, E. K., 2004 About the oldest domesticates among fishes. *J. Fish Biol.* 65: 1–  
603 27.

604 Bernatchez, L., M. Wellenreuther, C. Araneda, D. T. Ashton, J. M. I. Barth *et al.*,  
605 2017 Harnessing the power of genomics to secure seafood future. *Trends Ecol. Evol.*  
606 9: 665–680.

607 Besson, M., M. Vandeputte, J. van Arendonk, J. Aubin, I. de Boer *et al.*, 2016  
608 Influence of water temperature on the economic value of growth rate in fish farming:  
609 The case of sea bass (*Dicentrarchus labrax*) cage farming in the Mediterranean.  
610 *Aquaculture* 462: 47–55.

611 Bizuayehu, T. T., S. D. Johansen, V. Puvanendran, H. Toften, and I. Babiak, 2015  
612 Temperature during early development has long-term effects on microRNA

- 613 expression in Atlantic cod. *BMC Genomics* 16: 305.
- 614 Bolger, A. M., M. Lohse, and B. Usadel, 2014 Trimmomatic: a flexible trimmer for  
615 Illumina sequence data. *Bioinformatics* 29: 176–180.
- 616 Buckley, B. A., A. Y. Gracey, and G. N. Somero, 2006 The cellular response to heat  
617 stress in the goby *Gillichthys mirabilis*: a cDNA microarray and protein-level analysis.  
618 *J. Exp. Biol.* 209: 2660–2677.
- 619 Chen, H., L. Sheng, Z. Gong, S. Ru, and H. Bian, 2018 Investigation of the molecular  
620 mechanisms of hepatic injury upon naphthalene exposure in zebrafish (*Danio rerio*).  
621 *Ecotoxicology* 27: 650–660.
- 622 Claireaux, G., and C. Lefrançois, 2007 Linking environmental variability and fish  
623 performance: integration through the concept of scope for activity. *Philos. Trans. R.*  
624 *Soc. Lond. B Biol. Sci.* 362: 2031–2041.
- 625 Codina, M., D. García de la serrana, J. Sánchez-Gurmaches, N. Montserrat, O.  
626 Chistyakova *et al.*, 2008 Metabolic and mitogenic effects of IGF-II in rainbow trout  
627 (*Oncorhynchus mykiss*) myocytes in culture and the role of IGF-II in the PI3K/Akt and  
628 MAPK signalling pathways. *Gen. Comp. Endocrinol.* 157: 116–124.
- 629 Currie, S., and P. M. Schulte, 2014 Thermal stress, pp. 257–287 in *The physiology of*  
630 *fishes - 4th edition*, D.H. Evans, J.B. Clairbone and S. Currie, Boca Raton, Florida.
- 631 Devlin, R. H., and Y. Nagahama, 2002 Sex determination and sex differentiation in  
632 fish: an overview of genetic, physiological, and environmental influences.  
633 *Aquaculture* 208: 191–364.
- 634 Devlin, R. H., D. Sakhrani, W. E. Tymchuk, M. L. Rise, and B. Goh, 2009

635 Domestication and growth hormone transgenesis cause similar changes in gene  
636 expression in coho salmon (*Oncorhynchus kisutch*). Proc. Natl. Acad. Sci. 106:  
637 3047–3052.

638 Donelson, J. M., S. Salinas, P. L. Munday, and L. N. S. Shama, 2018  
639 Transgenerational plasticity and climate change experiments: Where do we go from  
640 here? Glob. Change Biol. 24: 13–34.

641 Douxfils, J., S. N. M. Mandiki, G. Marotte, N. Wang, F. Silvestre *et al.*, 2011a Does  
642 domestication process affect stress response in juvenile Eurasian perch *Perca*  
643 *fluviatilis*? Comp. Biochem. Physiol. A. Mol. Integr. Physiol. 159: 92–99.

644 Douxfils, J., S. N. M. Mandiki, C. Mathieu, S. Milla, and P. Kestemont, 2015  
645 Domestication and responses to stress, pp. 743–760 in *Biology and Culture of Percid*  
646 *Fishes*, Springer, Dordrecht.

647 Douxfils, J., C. Mathieu, S. N. M. Mandiki, S. Milla, E. Henrotte *et al.*, 2011b  
648 Physiological and proteomic evidences that domestication process differentially  
649 modulates the immune status of juvenile Eurasian perch (*Perca fluviatilis*) under  
650 chronic confinement stress. Fish Shellfish Immunol. 31: 1113–1121.

651 Fader, S. C., Z. Yu, and J. R. Spotila, 1994 Seasonal variation in heat shock proteins  
652 (hsp 70) in stream fish under natural conditions. J. Therm. Biol. 19: 335–341.

653 Fangué, N. A., M. Hofmeister, and P. M. Schulte, 2006 Intraspecific variation in  
654 thermal tolerance and heat shock protein gene expression in common killifish,  
655 *Fundulus heteroclitus*. J. Exp. Biol. 209: 2859–2872.

656 Filteau, M., S. A. Pavey, J. St-Cyr, and L. Bernatchez, 2013 Gene Coexpression  
657 Networks Reveal Key Drivers of Phenotypic Divergence in Lake Whitefish. Mol. Biol.

658 Evol. 30: 1384–1396.

659 Fry, F. E. J., 1971 The effect of environmental factors on the physiology of fish, pp.  
660 1–98 in *Fish physiology*, W. S. Hoar & D. J. Randall, New-York, NY.

661 Fuentes, E. N., B. T. Björnsson, J. A. Valdés, I. E. Einarsdottir, B. Lorca *et al.*, 2011  
662 IGF-I/PI3K/Akt and IGF-I/MAPK/ERK pathways in vivo in skeletal muscle are  
663 regulated by nutrition and contribute to somatic growth in the fine flounder. *Am. J.*  
664 *Physiol.-Regul. Integr. Comp. Physiol.* 300: R1532–R1542.

665 Fuentes, E. N., J. A. Valdés, A. Molina, and B. T. Björnsson, 2013 Regulation of  
666 skeletal muscle growth in fish by the growth hormone–insulin-like growth factor  
667 system. *Gen. Comp. Endocrinol.* 192: 136–148.

668 Glass, D. J., 2005 Skeletal muscle hypertrophy and atrophy signaling pathways. *Int.*  
669 *J. Biochem. Cell Biol.* 37: 1974–1984.

670 Haas, B. J., A. Papanicolaou, M. Yassour, M. Grabherr, P. D. Blood *et al.*, 2013 De  
671 novo transcript sequence reconstruction from RNA-seq using the Trinity platform for  
672 reference generation and analysis. *Nat. Protoc.* 8: 1494–1512.

673 Hardie, D. G., 2007 AMP-activated/SNF1 protein kinases: conserved guardians of  
674 cellular energy. *Nat. Rev. Mol. Cell Biol.* 8: 774–785.

675 Hardie, D. G., F. A. Ross, and S. A. Hawley, 2012 AMPK: a nutrient and energy  
676 sensor that maintains energy homeostasis. *Nat. Rev. Mol. Cell Biol.* 13: 251–262.

677 Hill, J. A., A. Kiessling, and R. H. Devlin, 2000 Coho salmon (*Oncorhynchus kisutch*)  
678 transgenic for a growth hormone gene construct exhibit increased rates of muscle  
679 hyperplasia and detectable levels of differential gene expression. *Can. J. Fish. Aquat.*

680 Sci. 57: 939–950.

681 Hirayama, M., H. Mitani, and S. Watabe, 2006 Temperature-dependent growth rates  
682 and gene expression patterns of various medaka *Oryzias latipes* cell lines derived  
683 from different populations. *J. Comp. Physiol. B* 176: 311–320.

684 Hochachka, P. W., and G. N. Somero, 2002 *Biochemical Adaptation*.

685 Hutchings, J. A., and D. J. Fraser, 2008 The nature of fisheries- and farming-induced  
686 evolution. *Mol. Ecol.* 17: 294–313.

687 Ikeda, M., W. Yu, M. Hirai, T. Ebisawa, S. Honma *et al.*, 2000 cDNA cloning of a  
688 novel bHLH-PAS transcription factor superfamily gene, BMAL2: its mRNA  
689 expression, subcellular distribution, and chromosomal localization. *Biochem.*  
690 *Biophys. Res. Commun.* 275: 493–502.

691 Iwama, G. K., L. O. B. Afonso, A. Todgham, P. Ackerman, and K. Nakano, 2004 Are  
692 hsps suitable for indicating stressed states in fish? *J. Exp. Biol.* 207: 15–19.

693 Jia, S., X. Li, S. Zheng, and G. Wu, 2017 Amino acids are major energy substrates  
694 for tissues of hybrid striped bass and zebrafish. *Amino Acids* 49: 2053–2063.

695 Khan, J. R., S. Pether, M. Bruce, S. P. Walker, and N. A. Herbert, 2015 The effect of  
696 temperature and ration size on specific dynamic action and production performance  
697 in juvenile hāpuku (*Polyprion oxygeneios*). *Aquaculture* 437: 67–74.

698 Klopfenstein, D. V., L. Zhang, B. S. Pedersen, F. Ramírez, A. Warwick Vesztröcy *et*  
699 *al.*, 2018 GOATOOLS: A Python library for Gene Ontology analyses. *Sci. Rep.* 8:.

700 Langfelder, P., and S. Horvath, 2008 WGCNA: an R package for weighted correlation  
701 network analysis. *BMC Bioinformatics* 9: 559.

- 702 Lewis, C. J. T., T. Pan, and A. Kalsotra, 2017 RNA modifications and structures  
703 cooperate to guide RNA–protein interactions. *Nat. Rev. Mol. Cell Biol.* 18: 202.
- 704 Li, Y., and R. Ponzoni, 2015 Some aspects of design and analysis of selection  
705 programmes in aquaculture species. *J. Anim. Breed. Genet.* 132: 169–175.
- 706 Lindquist, S., and E. A. Craig, 1988 The Heat-Shock Proteins. *Annu. Rev. Genet.* 22:  
707 631–677.
- 708 Logan, C. A., and G. N. Somero, 2010 Transcriptional responses to thermal  
709 acclimation in the eurythermal fish *Gillichthys mirabilis* (Cooper 1864). *Am. J.*  
710 *Physiol.-Regul. Integr. Comp. Physiol.* ajpregu. 00306.2010.
- 711 López-Maury, L., S. Marguerat, and J. Bähler, 2008 Tuning gene expression to  
712 changing environments: from rapid responses to evolutionary adaptation. *Nat. Rev.*  
713 *Genet.* 9: 583–593.
- 714 Luo, W., and C. Brouwer, 2013 Pathview: an R/Bioconductor package for pathway-  
715 based data integration and visualization. *Bioinforma. Oxf. Engl.* 29: 1830–1831.
- 716 Matsunari, H., H. Furuita, T. Yamamoto, S.-K. Kim, Y. Sakakura *et al.*, 2008 Effect of  
717 dietary taurine and cystine on growth performance of juvenile red sea bream *Pagrus*  
718 *major*. *Aquaculture* 274: 142–147.
- 719 Menaker, M., and S. Wisner, 1983 Temperature-compensated circadian clock in the  
720 pineal of *Anolis*. *Proc. Natl. Acad. Sci.* 80: 6119–6121.
- 721 Metzger, D. C. H., and P. M. Schulte, 2018 Similarities in temperature-dependent  
722 gene expression plasticity across timescales in threespine stickleback (*Gasterosteus*  
723 *aculeatus*). *Mol. Ecol.* 27: 2381–2396.



- 724 Mignon-Grasteau, S., A. Boissy, J. Bouix, J.-M. Faure, A. D. Fisher *et al.*, 2005  
725 Genetics of adaptation and domestication in livestock. *Livest. Prod. Sci.* 93: 3–14.
- 726 Millot, S., M.-L. Bégout, and B. Chatain, 2009 Risk-taking behaviour variation over  
727 time in sea bass *Dicentrarchus labrax*: effects of day-night alternation, fish  
728 phenotypic characteristics and selection for growth. *J. Fish Biol.* 75: 1733–1749.
- 729 Millot, S., S. Péan, D. Leguay, A. Vergnet, B. Chatain *et al.*, 2010 Evaluation of  
730 behavioral changes induced by a first step of domestication or selection for growth in  
731 the European sea bass (*Dicentrarchus labrax*): A self-feeding approach under  
732 repeated acute stress. *Aquaculture* 306: 211–217.
- 733 Mininni, A. N., M. Milan, S. Ferrareso, T. Petochi, P. Di Marco *et al.*, 2014 Liver  
734 transcriptome analysis in gilthead sea bream upon exposure to low temperature.  
735 *BMC Genomics* 15: 765.
- 736 Moriya, Y., M. Itoh, S. Okuda, A. C. Yoshizawa, and M. Kanehisa, 2007 KAAS: an  
737 automatic genome annotation and pathway reconstruction server. *Nucleic Acids Res.*  
738 35: W182–W185.
- 739 Mulder, H. A., 2016 Genomic selection improves response to selection in resilience  
740 by exploiting genotype by environment interactions. *Front. Genet.* 7:.
- 741 Nguyen, N. H., A. Hamzah, and N. P. Thoa, 2017 Effects of genotype by  
742 environment interaction on genetic gain and genetic parameter estimates in Red  
743 Tilapia (*Oreochromis spp.*). *Front. Genet.* 8: 82.
- 744 Oksala, N. K. J., F. G. Ekmekçi, E. Özsoy, Ş. Kirankaya, T. Kokkola *et al.*, 2014  
745 Natural thermal adaptation increases heat shock protein levels and decreases  
746 oxidative stress. *Redox Biol.* 3: 25–28.

- 747 Olesen, I., T. Gjedrem, H. Bentsen, B. Gjerde, and M. Rye, 2003 Breeding programs  
748 for sustainable aquaculture. *J. Appl. Aquac.* 13: 179–204.
- 749 Parsons, D., C. Sim-Smith, M. Cryer, M. Francis, B. Hartill *et al.*, 2014 Snapper  
750 (*Chrysophrys auratus*): a review of life history and key vulnerabilities in New Zealand.  
751 *N. Z. J. Mar. Freshw. Res.* 48: 256–283.
- 752 Pasquier, J., C. Cabau, T. Nguyen, E. Jouanno, D. Severac *et al.*, 2016 Gene  
753 evolution and gene expression after whole genome duplication in fish: the PhyloFish  
754 database. *BMC Genomics* 17: 368.
- 755 Pörtner, H.-O., 2010 Oxygen- and capacity-limitation of thermal tolerance: a matrix  
756 for integrating climate-related stressor effects in marine ecosystems. *J. Exp. Biol.*  
757 213: 881–893.
- 758 Rensing, L., and P. Ruoff, 2002 Temperature effect on entrainment, phase shifting,  
759 and amplitude of circadian clocks and its molecular bases. *Chronobiol. Int.* 19: 807–  
760 864.
- 761 Roberge, C., S. Einum, H. Guderley, and L. Bernatchez, 2005 Rapid parallel  
762 evolutionary changes of gene transcription profiles in farmed Atlantic salmon. *Mol.*  
763 *Ecol.* 15: 9–20.
- 764 Robinson, M. D., D. J. McCarthy, and G. K. Smyth, 2010 edgeR: a Bioconductor  
765 package for differential expression analysis of digital gene expression data.  
766 *Bioinforma. Oxf. Engl.* 26: 139–140.
- 767 Rye, M., and B. Gjerde, 1996 Phenotypic and genetic parameters of body  
768 composition traits and flesh colour in Atlantic salmon, *Salmo salar* L. *Aquac. Res.* 27:  
769 121–134.

- 770 Sandblom, E., A. Gräns, M. Axelsson, and H. Seth, 2014 Temperature acclimation  
771 rate of aerobic scope and feeding metabolism in fishes: implications in a thermally  
772 extreme future. *Proc. R. Soc. Lond. B Biol. Sci.* 281:.
- 773 Sauvage, C., N. Derome, E. Normandeau, J. St-Cyr, C. Audet *et al.*, 2010 Fast  
774 Transcriptional Responses to Domestication in the Brook Charr *Salvelinus fontinalis*.  
775 *Genetics* 185: 105-U168.
- 776 Sawyer, L. A., J. M. Hennessy, A. A. Peixoto, E. Rosato, H. Parkinson *et al.*, 1997  
777 Natural variation in a drosophila clock gene and temperature compensation. *Science*  
778 278: 2117–2120.
- 779 Schaffer, W. M., 1979 Equivalence of maximizing reproductive value and fitness in  
780 the case of reproductive strategies. *Proc. Natl. Acad. Sci.* 76: 3567–3569.
- 781 Schulte, P. M., 2014 What is environmental stress? Insights from fish living in a  
782 variable environment. *J. Exp. Biol.* 217: 23–34.
- 783 Seebacher, F., W. Davison, C. J. Lowe, and C. E. Franklin, 2005 A falsification of the  
784 thermal specialization paradigm: compensation for elevated temperatures in Antarctic  
785 fishes. *Biol. Lett.* 1: 151–154.
- 786 Shannon, P., A. Markiel, O. Ozier, N. S. Baliga, J. T. Wang *et al.*, 2003 Cytoscape: a  
787 software environment for integrated models of biomolecular interaction networks.  
788 *Genome Res.* 13: 2498–2504.
- 789 Simão, F. A., R. M. Waterhouse, P. Ioannidis, E. V. Kriventseva, and E. M. Zdobnov,  
790 2015 BUSCO: assessing genome assembly and annotation completeness with  
791 single-copy orthologs. *Bioinformatics* 31: 3210–3212.

- 792 Smith-Unna, R., C. Bournnell, R. Patro, J. M. Hibberd, and S. Kelly, 2016 TransRate:  
793 reference-free quality assessment of de novo transcriptome assemblies. *Genome*  
794 *Res.* 26: 1134–1144.
- 795 Taberlet, P., E. Coissac, J. Pansu, and F. Pompanon, 2011 Conservation genetics of  
796 cattle, sheep, and goats. *C. R. Biol.* 334: 247–254.
- 797 Takagi, S., H. Murata, T. Goto, T. Ichiki, M. Endo *et al.*, 2006 Efficacy of taurine  
798 supplementation for preventing green liver syndrome and improving growth  
799 performance in yearling red sea bream *Pagrus major* fed low-fishmeal diet. *Fish. Sci.*  
800 72: 1191–1199.
- 801 Thorpe, J. E., 1994 Performance thresholds and life-history flexibility in salmonids.  
802 *Conserv. Biol.* 8: 877–879.
- 803 Uhlar, C. M., and A. S. Whitehead, 1999 Serum amyloid A, the major vertebrate  
804 acute-phase reactant. *Eur. J. Biochem.* 265: 501–523.
- 805 Volf, J., 2005 Genome evolution and biodiversity in teleost fish. *Heredity* 94: 280–  
806 294.
- 807 Weber, J.-M., K. Choi, A. Gonzalez, and T. Omlin, 2016 Metabolic fuel kinetics in  
808 fish: swimming, hypoxia and muscle membranes. *J. Exp. Biol.* 219: 250–258.
- 809 Wellenreuther, M., and B. Hansson, 2016 Detecting polygenic evolution: problems,  
810 pitfalls, and promises. *Trends Genet.* 32: 155–164.
- 811 Wells, R. M. G., J. Baldwin, R. S. Seymour, K. A. Christian, and A. P. Farrell, 2007  
812 Air breathing minimizes post-exercise lactate load in the tropical Pacific tarpon,  
813 *Megalops cyprinoides* Broussonet 1782 but oxygen debt is repaid by aquatic

814 breathing. *J. Fish Biol.* 71: 1649–1661.

815 Yáñez, J. M., S. Newman, and R. D. Houston, 2015 Genomics in aquaculture to  
816 better understand species biology and accelerate genetic progress. *Front. Genet.* 6:  
817 128.

818 Zeder, M. A., 2015 Core questions in domestication research. *Proc. Natl. Acad. Sci.*  
819 112: 3191–3198.

820 Zhdanova, I. V., and S. G. Reeb, 2006 Circadian rhythms in fish, pp. 197 in *Fish*  
821 *Physiology*, Elsevier.

822

823

824

## TABLE AND FIGURE LEGENDS

825 **Table 1: Phenotypic values of wild and domesticated *C. auratus* used in the low**  
826 **and high temperature treatments.** Errors in brackets are sem, n=8. All  
827 physiological traits were measured upon termination of the experiment.

828 **Table 2: Sequencing results, reads pre-processing and mapping summaries.**

829 **Table 3: Assembly and annotation statistics**

830 **Table 4: Number of differentially expressed genes using a contrast approach**  
831 **and glm model in edgeR.** Genes were considered differentially expressed when  
832 FDR below 1% and  $|\log_2FC| > 2$ . A single gene showed significant interaction  
833 (genotype x temperature; FDR < 1%;).

834 **Table S1: Sequencing, filtering and mapping statistics.**

835 **Table S2: Gene ontology enrichment analysis by module of co-expression**  
836 **network analysis.**

837 **Figure 1: Specific growth rates of wild and domesticated *C. auratus***  
838 **(8n/treatment) at the start and end of the low and warm temperature**  
839 **experiment.**

840 **Figure 2: Effect of temperature and genotype on gene expression.** A) Venn  
841 diagram showing the overlap between genotype and temperature in an additive effect  
842 (parallel reaction norms); B) Heatmap and K-means clustering of genes showing  
843 differential expression between genotypes and/or temperature; C) Distance-base  
844 redundancy analysis (db-RDA) performed on the expression data (logCPM [prior  
845 count 2]). Only genes with min logCPM > 1 in at least 3 samples were retained for

846 the analysis (n = 14,372). The db-RDA model was globally significant (p < 0.001) and  
847 explained 59.8% of all expression variation (adj.  $R^2 = 0.598$ ). Genotype and  
848 temperature significantly explained 17.2% and 47.2% of the variation, respectively,  
849 after controlling for each other with subsequent partial db-RDAs. Significance codes:  
850 p-value < 0.001 '\*\*\*'; p-value < 0.01 '\*\*'

851 **Figure 3: Co-expression network analysis.** A) Correlation matrix from WGCNA.  
852 The matrix of co-expression was built on a total of 11,426 genes after removal of low-  
853 expressed genes (logCPM < 1 in at least 2 individuals and genes with gene  
854 expression variance < 0.1 in the global dataset). Only modules significantly  
855 correlating (p-value < 0.01) with temperature or genotype are represented. Values  
856 and indicate the correlation value ( $R^2$ ). B) Correlation between module membership  
857 and gene significance for the modules with the highest correlation to temperature  
858 (modules bisque4 and darkviolet) and genotype (module darkorange2).

859 **Figure 4: Differentially expressed genes in the KEGG pathway of the circadian**  
860 **rhythm.** Kegg ontology were extracted from the KAAS online tools and plot using  
861 pathview package in R. Scale represent the log2FC expression levels between high  
862 and low conditions from edgeR analysis. Negative and positive values represent  
863 genes up-regulated and down-regulated in high temperature fish, irrespective of the  
864 genotype.

865 **Figure 5: Gene interactions between temperature and genotype.**

866 Table 1

|                                  | Low Temperature Treatment |                         | High Temperature Treatment |                         |
|----------------------------------|---------------------------|-------------------------|----------------------------|-------------------------|
|                                  | Wild Population           | Domesticated Population | Wild Population            | Domesticated Population |
| <b>Starting Mass (g)</b>         | 159.5 (6.7)               | 149.5 (4.7)             | 145.9 (7.9)                | 151.2 (4.6)†            |
| <b>Terminal Mass (g)</b>         | 144.3 (7.0)               | 150.5 (4.8)             | 154.4 (7.0)*               | 178.9 (6.6) †*          |
| <b>Starting Fork length (mm)</b> | 189.6 (3.1)               | 194.2 (1.6)             | 186.9 (3.4)                | 194.7 (3.3)†            |
| <b>Terminal Fork length (mm)</b> | 189.6 (3.1)               | 194.4 (1.6)             | 190.3 (3.0)                | 200.3 (3.0)             |
| <b>SGR (% Body mass day-1 )</b>  | -0.37 (0.09)              | 0.03 (0.05)†            | 0.22 (0.07)*               | 0.60 (0.07)†*           |
| <b>LGR (mm day-1)</b>            | 0.01 (0.00)               | 0.01 (0.01)             | 0.12 (0.03)*               | 0.21 (0.05) †*          |
| <b>Hepatosomatic index (HSI)</b> | 1.57 (0.13)               | 1.48 (0.13)             | 1.57 (0.19)                | 1.67 (0.10)             |
| <b>Cardiosomatic index (CSI)</b> | 0.15 (0.03)               | 0.12 (0.03)             | 0.09 (0.01)                | 0.12 (0.01)†            |
| <b>Haematocrit (%)</b>           | 28.0 (1.0)                | 33.4 (2.2)              | 30.4 (0.5)*                | 32.6 (1.0)              |
| <b>Haemoglobin (g dL-1)</b>      | 6.0 (0.1)                 | 4.8 (0.4)†              | 6.2 (0.2)                  | 6.2 (0.2)               |
| <b>MCHC (g dL-1)</b>             | 21.4 (0.7)                | 14.4 (0.5)†             | 20.5 (3.5)                 | 19.0 (0.7)*             |
| <b>Triglycerides (g dL-1)</b>    | 1.00 (0.10)               | 2.50 (0.29)†            | 4.24 (0.52)*               | 4.13 (0.21)*            |
| <b>Plasma Lactate (mM)</b>       | 2.23 (0.38)               | 1.68 (0.10)             | 3.19 (0.30)                | 3.45 (0.28)*            |



|                            |              |              |              |               |
|----------------------------|--------------|--------------|--------------|---------------|
| <b>Plasma Glucose (mM)</b> | 11.33 (0.69) | 11.76 (1.01) | 9.22 (0.58)* | 6.47 (0.60)†* |
|----------------------------|--------------|--------------|--------------|---------------|

---

867 \* denotes significantly different values between temperature treatments within the same (wild/domesticated) population, † denotes  
868 significant differences between wild and domesticated *C. auratus* at comparable temperatures. Analyses were performed using  
869 parametric ANOVA with a Bonferroni adjustment. Significance was accepted at  $p < 0.05$ , non-parametric data was log transformed to  
870 meet assumptions of normality or homoscedasticity.

871

872 **Table 2**

| <b>Treatment</b>    | <b>Samples</b> | <b>Raw PE reads</b> | <b>Trimmed PE reads</b> | <b>Mapped PE reads</b> | <b>Mapping rate (%)</b> |
|---------------------|----------------|---------------------|-------------------------|------------------------|-------------------------|
| Domesticated - High | DH.1MA         | 23.0 M              | 22.4 M                  | 18.0 M                 | 80.1                    |
| Domesticated - High | DH.4MA         | 23.3 M              | 22.7 M                  | 18.2 M                 | 80.4                    |
| Domesticated - High | DH.5MA         | 33.9 M              | 21.5 M                  | 17.6 M                 | 81.9                    |
| Domesticated – Low  | DL.4MA         | 23.3 M              | 22.6 M                  | 17.9 M                 | 79.3                    |
| Domesticated – Low  | DL.5MA         | 23.4 M              | 22.8 M                  | 17.9 M                 | 78.6                    |
| Domesticated – Low  | DL.6MA         | 23.4 M              | 22.8 M                  | 17.7 M                 | 77.9                    |
| Wild –High          | WH.1MA         | 22.3 M              | 21.6 M                  | 17.6 M                 | 82.0                    |
| Wild –High          | WH.2MA         | 22.5 M              | 21.9 M                  | 18.0 M                 | 81.9                    |
| Wild –Low           | WL.1MA         | 22.9 M              | 22.2 M                  | 15.9 M                 | 71.6                    |
| Wild –Low           | WL.3MA         | 23.2 M              | 22.6 M                  | 17.6 M                 | 77.8                    |
| Wild –Low           | WL.6MA         | 22.3 M              | 21.6 M                  | 16.4 M                 | 75.7                    |

873

874

875 **Table 3**

---

| <b>Transcriptome statistics</b>                   |              |
|---------------------------------------------------|--------------|
| Total number contigs                              | 33, 017      |
| Percent GC                                        | 48.61        |
| Contigs N50 (bp)                                  | 2,804        |
| Total assembled bases                             | 63, 545, 739 |
| Median contig length (bp)                         | 1,482        |
| Average contig length (bp)                        | 1,924.64     |
| <b>Annotation</b>                                 |              |
| Contig with Uniprot-sp match (e-value $10^{-6}$ ) | 26, 589      |
| Contig with GO identifier annotation              | 25, 837      |

---

876

877 **Table 4**

| <b>Effect</b>                      | <b>Condition A / B</b> | <b>Up-regulated</b> | <b>Down-regulated</b> | <b>Total</b> |
|------------------------------------|------------------------|---------------------|-----------------------|--------------|
| <b>Major effect</b>                |                        |                     |                       |              |
| Temperature                        | Low / High             | 736                 | 725                   | 1,461        |
| Genotype                           | Domesticated / Wild    | 56                  | 150                   | 206          |
| <b>Interaction effect</b>          |                        |                     |                       |              |
| Interaction Genotype x Temperature |                        |                     |                       | 1            |

878 **Figure 1**

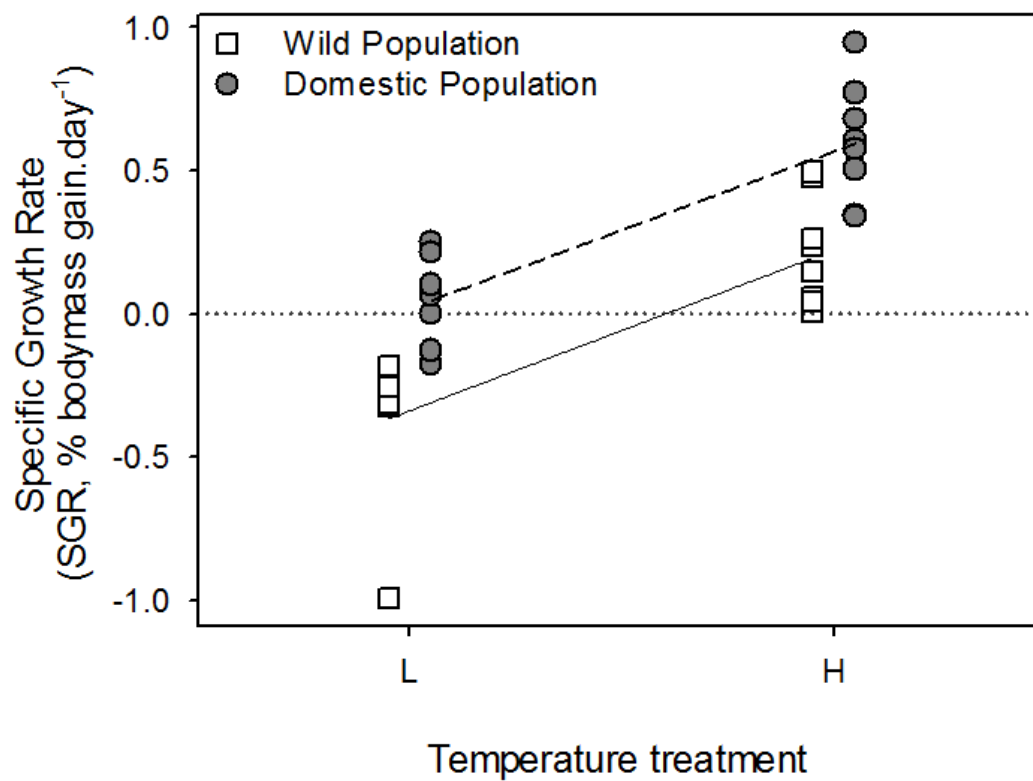

879  
880

881 **Figure 2**

882

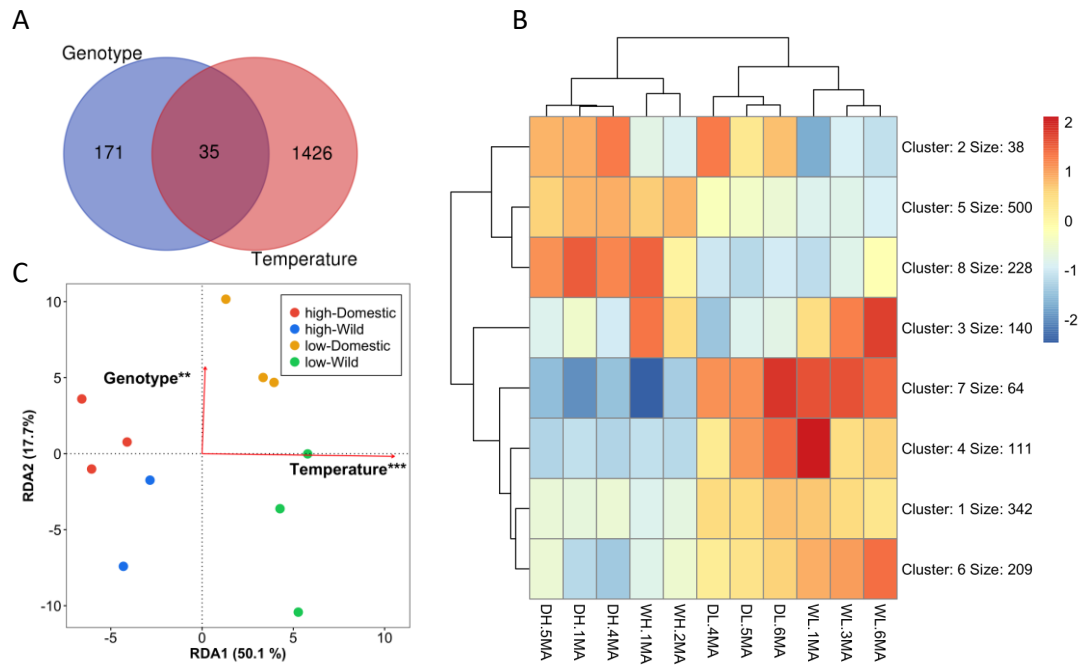

883

884

885 **Figure 3**

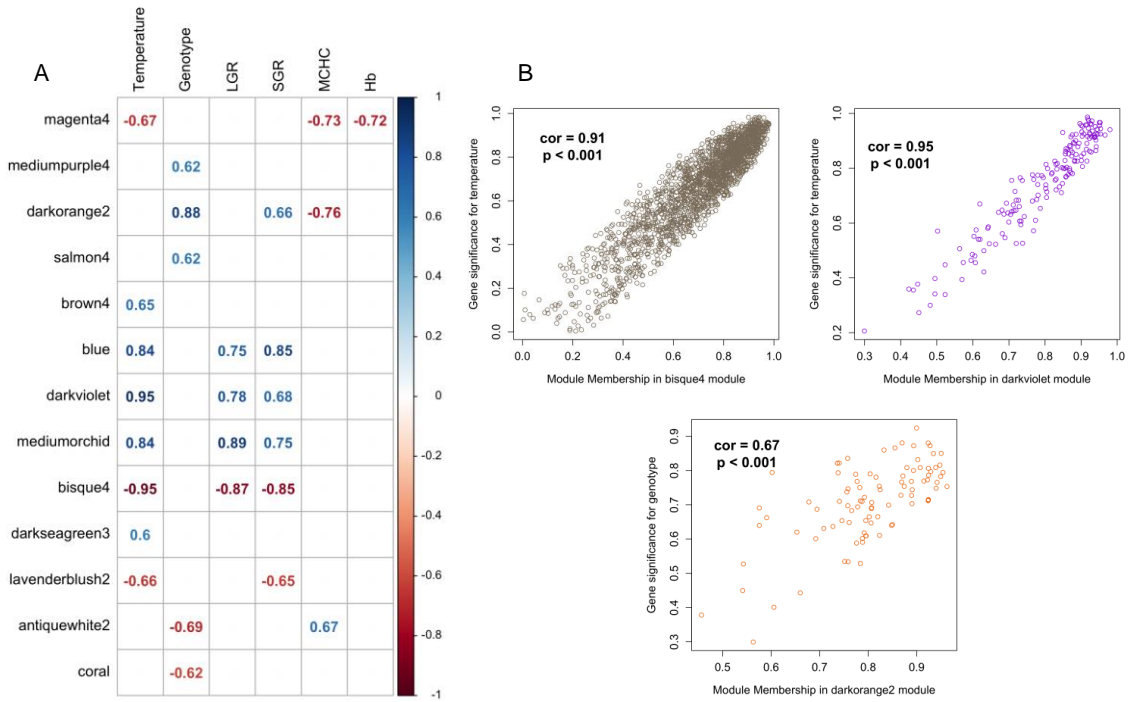

886

887

888 **Figure 4**

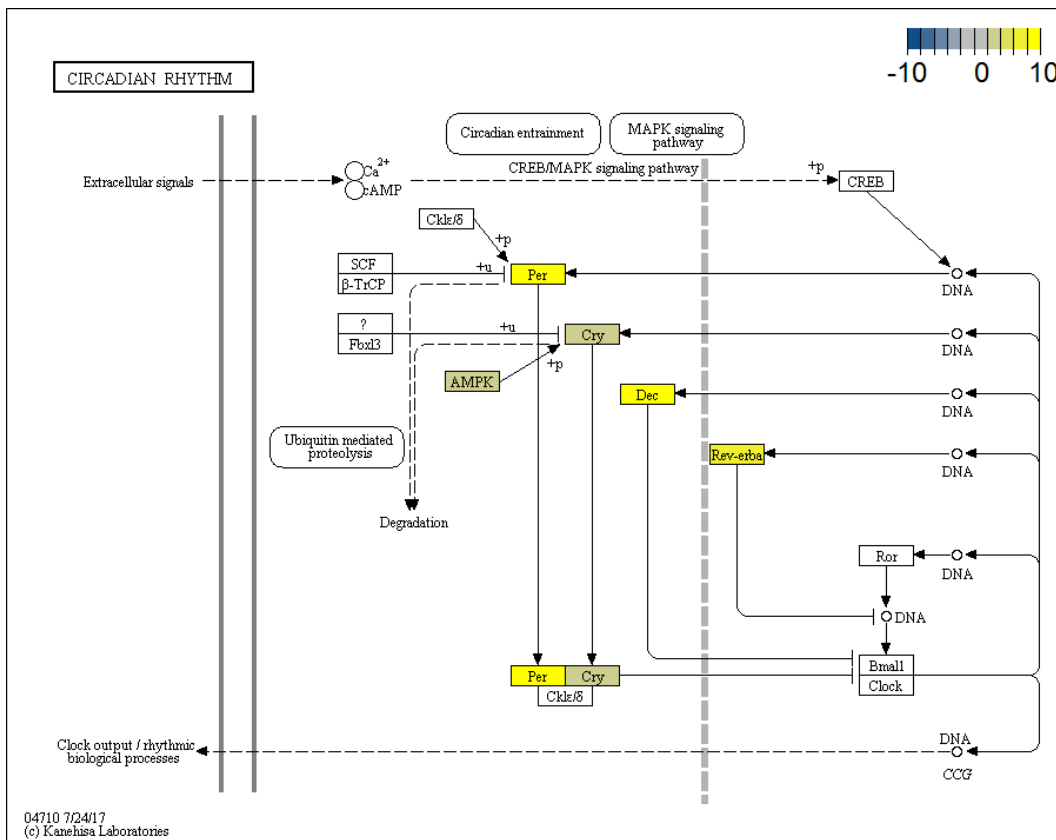

889

890



891 **Figure 5**

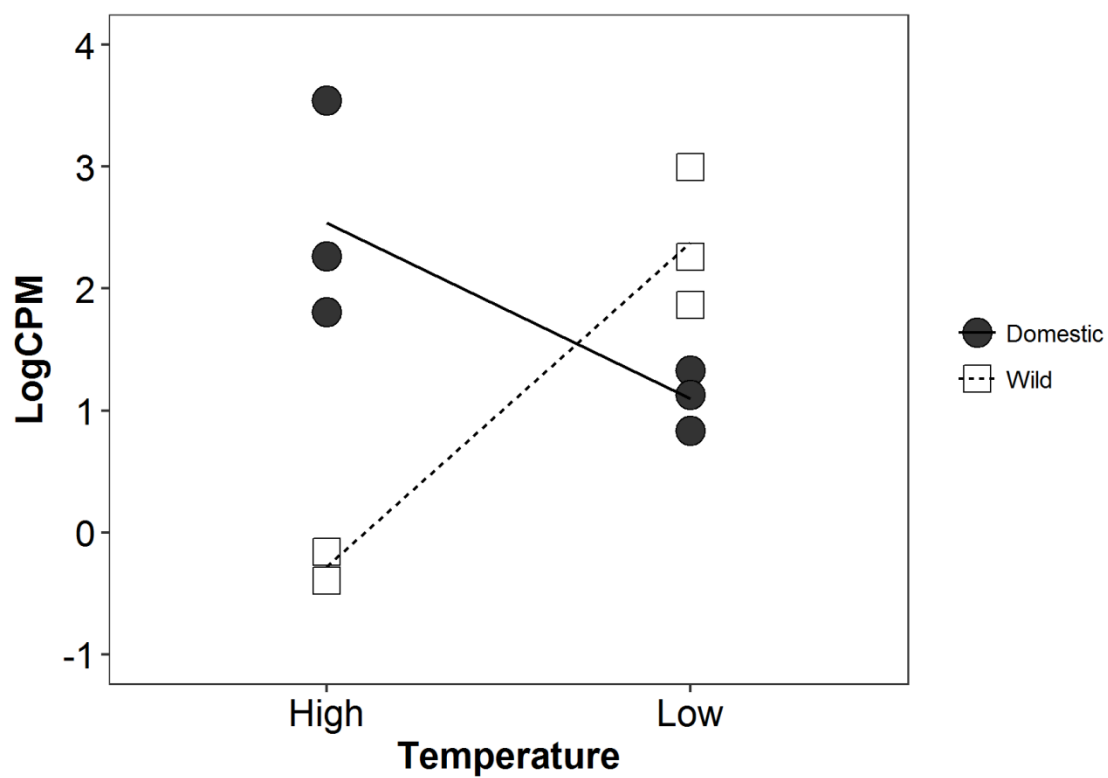

892

893

894

## SUPPLEMENTARY MATERIAL

895 **Table S1**

| Explanation         | Read     | length(bp) | Clean bases | Q20 (%) | GC (%) |
|---------------------|----------|------------|-------------|---------|--------|
| Domesticated_High_1 | 46075138 | 46075138   | 99.37       | 99.1    | 49.66  |
| Domesticated_High_2 | 46697118 | 46697118   | 99.38       | 99.11   | 49.85  |
| Domesticated_High_3 | 44622780 | 44622780   | 98.87       | 99.12   | 50.73  |
| Domesticated_Low_1  | 46441522 | 46441522   | 99.39       | 99.09   | 50.24  |
| Domesticated_Low_2  | 46838422 | 46838422   | 99.38       | 99.1    | 50.02  |
| Domesticated_Low_3  | 46794464 | 46794464   | 99.4        | 99.13   | 49.69  |
| Wild_High_1         | 44578618 | 44578618   | 99.32       | 99.07   | 50.5   |
| Wild_High_2         | 45084660 | 45084660   | 99.4        | 99.11   | 50.22  |
| Wild_High_3         | 46410466 | 46410466   | 99.35       | 98.88   | 45.73  |
| Wild_Low_1          | 45726408 | 45726408   | 99.33       | 99.01   | 49.76  |
| Wild_Low_2          | 46485580 | 46485580   | 99.37       | 99.04   | 50.47  |
| Wild_Low_3          | 44561442 | 44561442   | 99.41       | 99.01   | 50.32  |

896

897 **Table S2:**

898 Gene significance and module membership results for genotype and temperature  
899 and gene ontology results by module.
